# Supplementary material for: PB@Co3O4 nanoparticles as both oxidase and peroxidase mimics and their application for colorimetric detection of glutathione
Source: Royal Society of Chemistry journal article supplement (doi:10.1039/c5nj01744k), 2015-01-01
Supplement: c5nj01744k1.pdf [file c5nj01744k1.pdf]

## Supporting information

### **PB@Co<sub>3</sub>O<sub>4</sub> nanoparticles as both oxidase and peroxidase mimics and their application for colorimetric detection of glutathione**

Wenshu Yang,<sup>a,b</sup> Jinhui Hao,<sup>a,b</sup> Zhe Zhang,<sup>a</sup> and Bailin Zhang\*<sup>a</sup>

<sup>a</sup> State Key Laboratory of Electroanalytical Chemistry, Changchun Institute of Applied Chemistry, Chinese Academy of Sciences, Changchun 130022, (P. R. China)

E-mail: blzhang@ciac.ac.cn; Fax: +86 431-85262430; Tel: +86 431-85262430

<sup>b</sup> University of Chinese Academy of Sciences, Beijing 100049 (P.R. China)

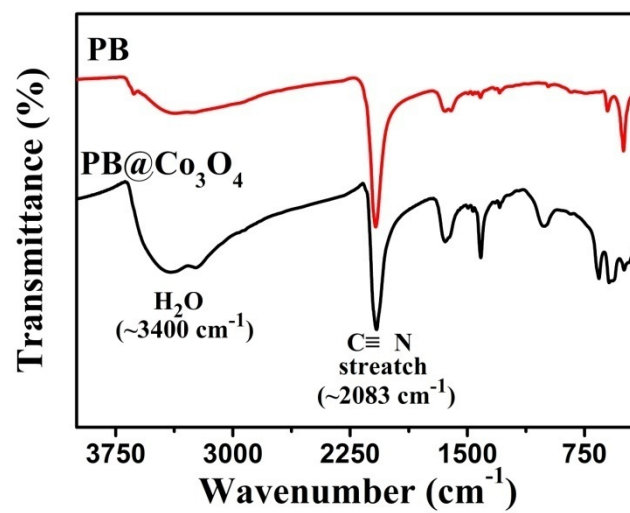

**Fig. S1** The FTIR spectra of PB and PB@Co<sub>3</sub>O<sub>4</sub> NPs.

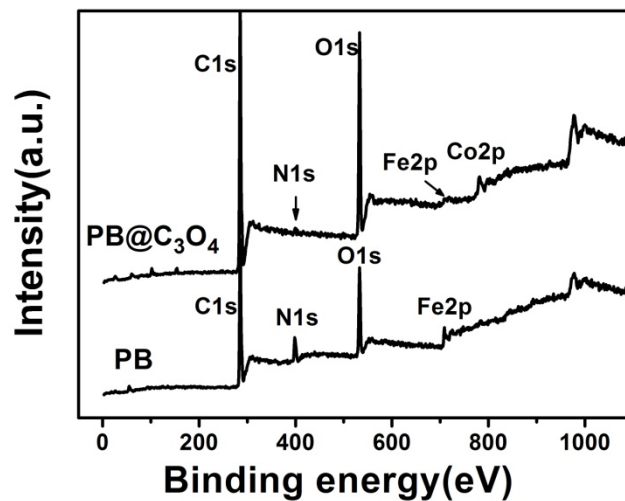

**Fig. S2** XPS spectra of PB nanocubes and PB@Co<sub>3</sub>O<sub>4</sub> NPs.

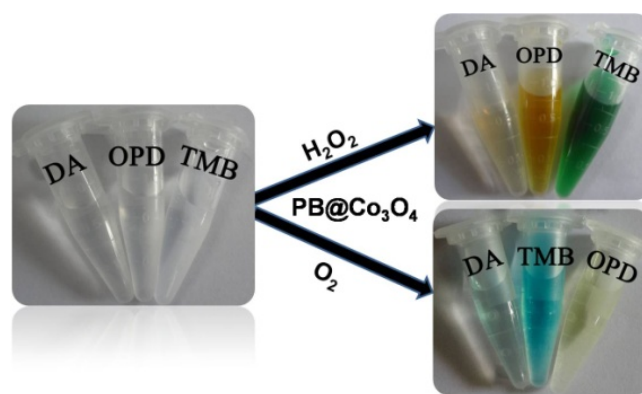

**Fig. S3** Optical photographs of the oxidation reaction of TMB, DA (dopamine) and OPD (O-phenylenediamine) by PB@Co<sub>3</sub>O<sub>4</sub> NPs with/without H<sub>2</sub>O<sub>2</sub>.

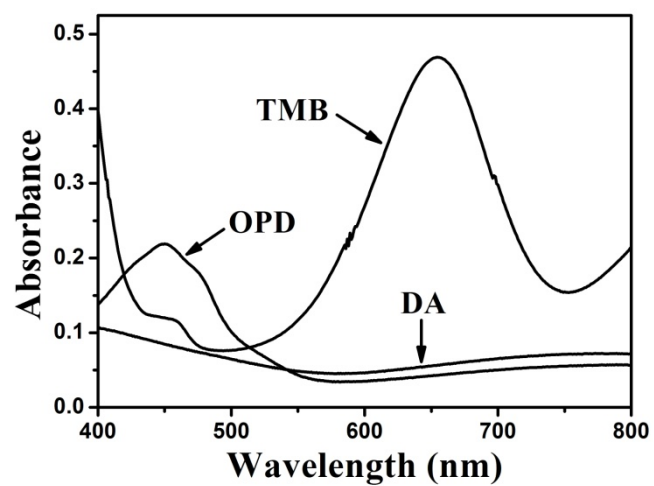

**Fig. S4** UV/Vis spectra of TMB, DA and OPD solutions in 0.1 M NaAc-HAc buffer (pH 3.0) at 60 °C for 10 min.

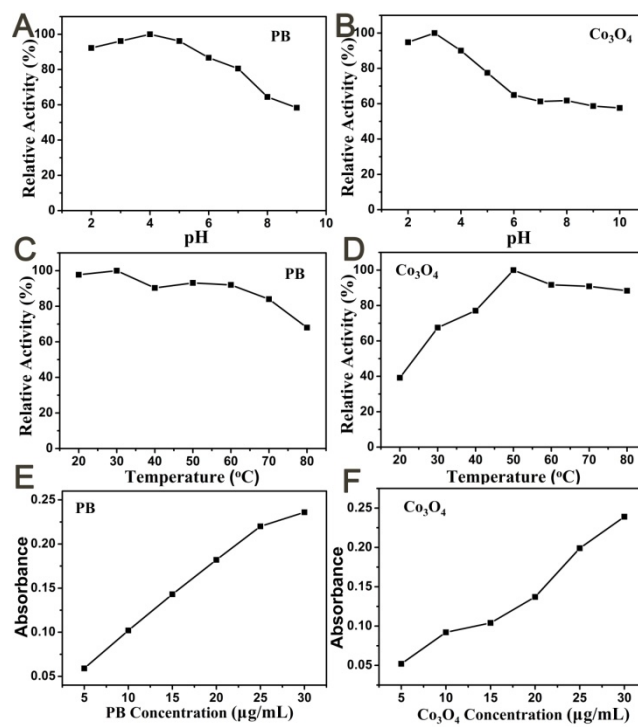

**Fig. S5** Dependence of the catalytic activity toward TMB of PB (A, C, E) and Co<sub>3</sub>O<sub>4</sub> NPS (B, D, F) on pH, temperature and catalyst concentration in the absence of H<sub>2</sub>O<sub>2</sub>.

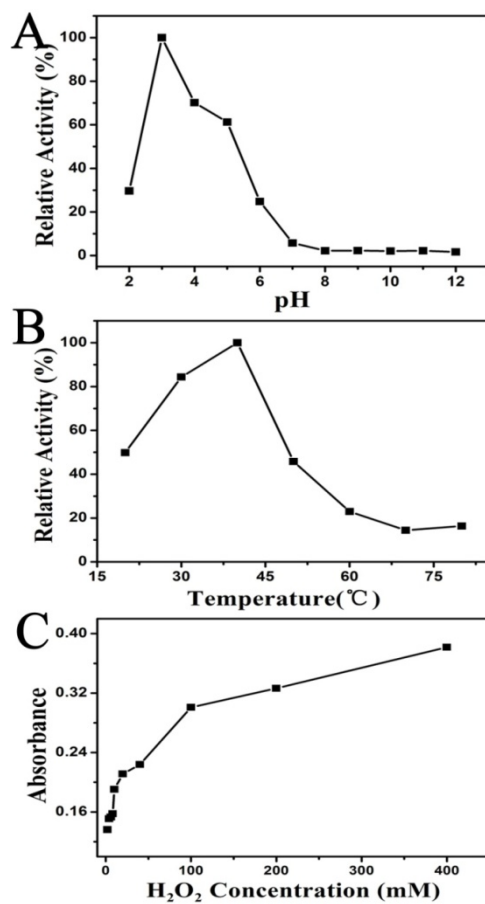

**Fig. S6** Dependence of the peroxidase-like activity of PB@Co<sub>3</sub>O<sub>4</sub> NPs on pH (A), temperature (B) and H<sub>2</sub>O<sub>2</sub> concentration (C).

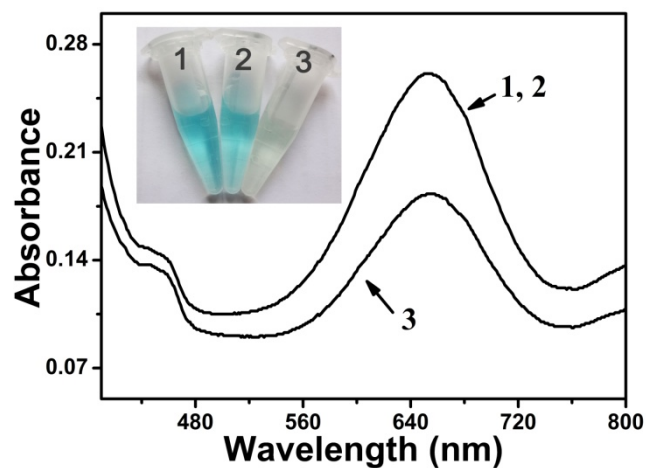

**Fig. S7** Effect of radical inhibitors on the absorbance PB@Co<sub>3</sub>O<sub>4</sub> NPs-TMB system in the absence (1) and presence of isopropyl alcohol (2) and benzoquinone (3). Experiment condition: 20  $\mu\text{g/mL}$  of PB@Co<sub>3</sub>O<sub>4</sub> NPs, 0.5 mM of TMB, 0.5 mM of isopropyl alcohol and benzoquinone, in buffer solution (pH 3.0) incubating 10 minutes at 60  $^{\circ}\text{C}$ .



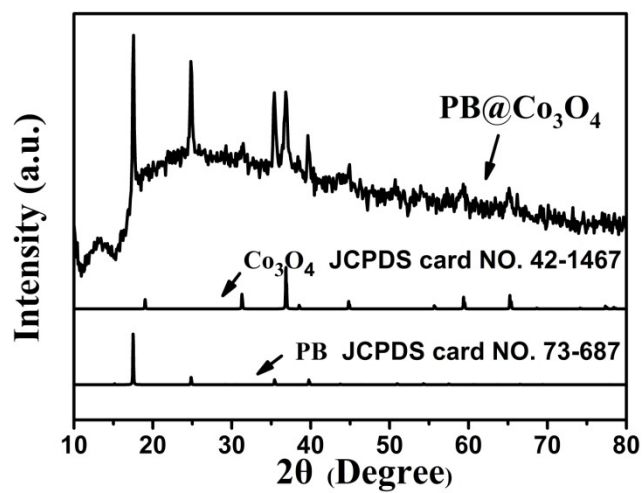

**Fig. S8** XRD pattern of PB@Co<sub>3</sub>O<sub>4</sub> NPs after the catalytic reaction toward TMB without H<sub>2</sub>O<sub>2</sub>.

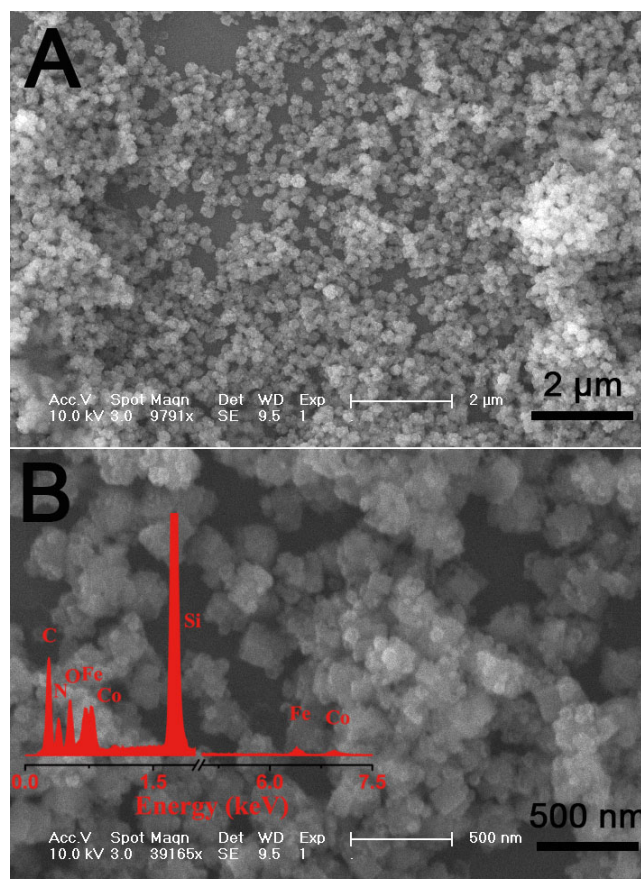

**Fig. S9** SEM images and EDX spectrum of PB@Co<sub>3</sub>O<sub>4</sub> NPs after the catalytic reaction toward TMB without H<sub>2</sub>O<sub>2</sub>.
